# Supplementary material for: Stability of bacteriophages in burn wound care products
Source: PubMed Central journal article supplement (PMC5531522; doi:10.1371/journal.pone.0182121), 2017-07-27

## A) Wound care products

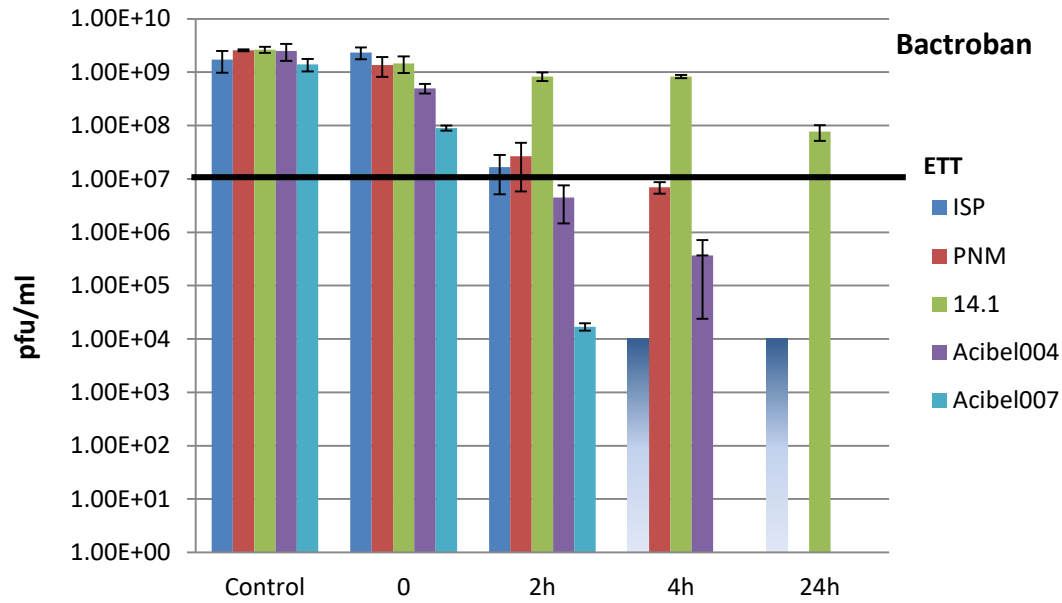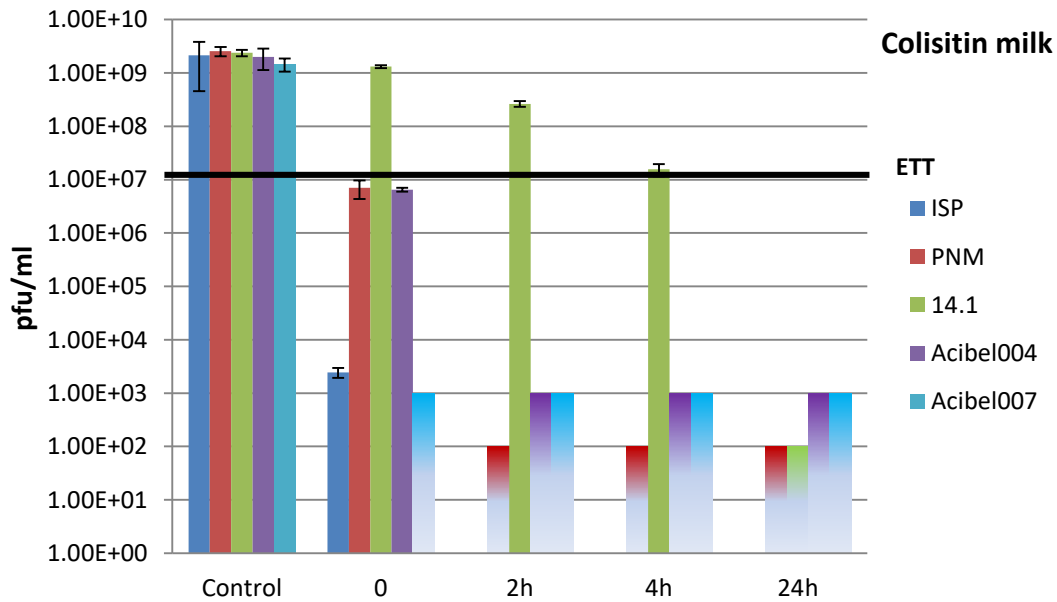

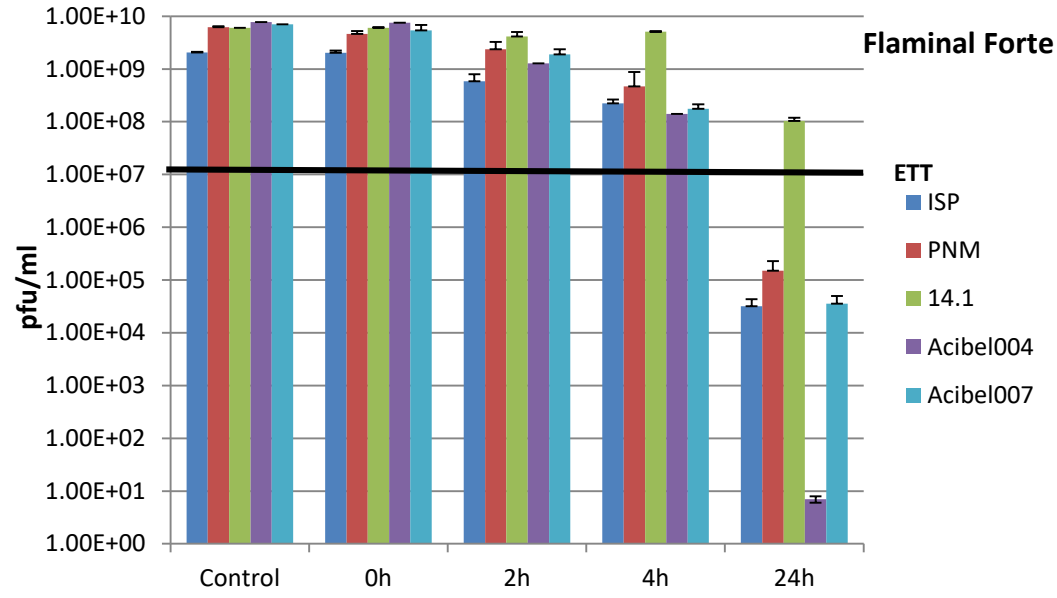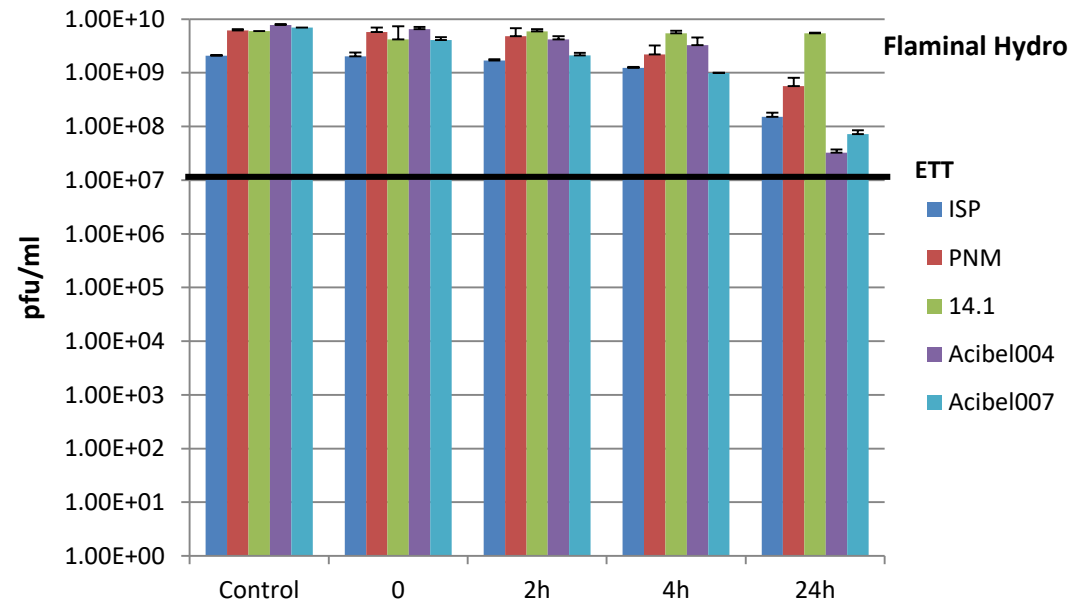

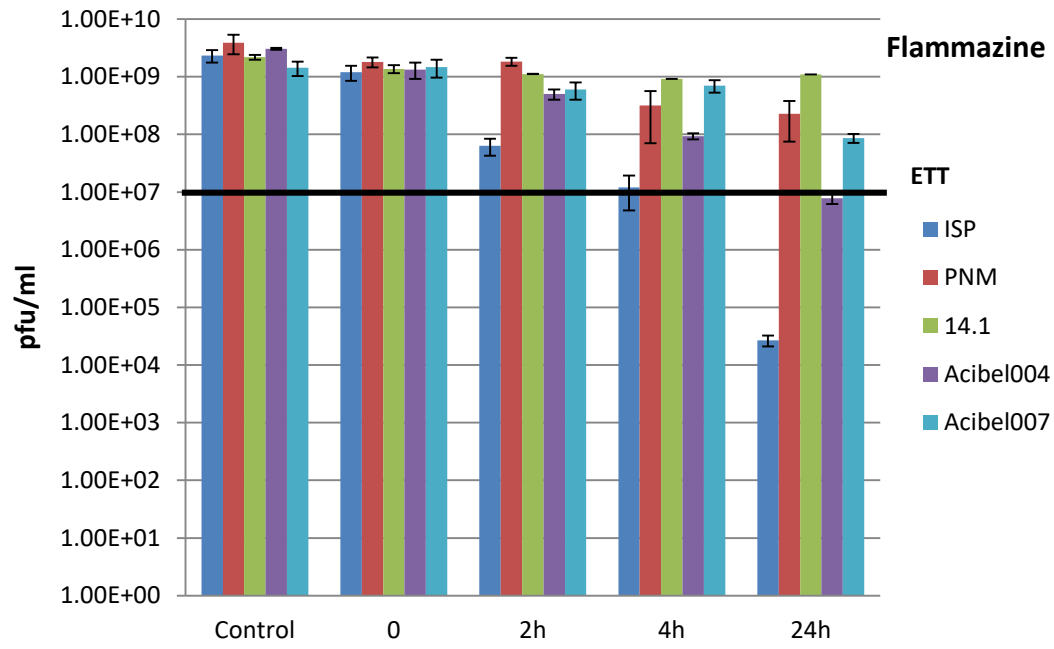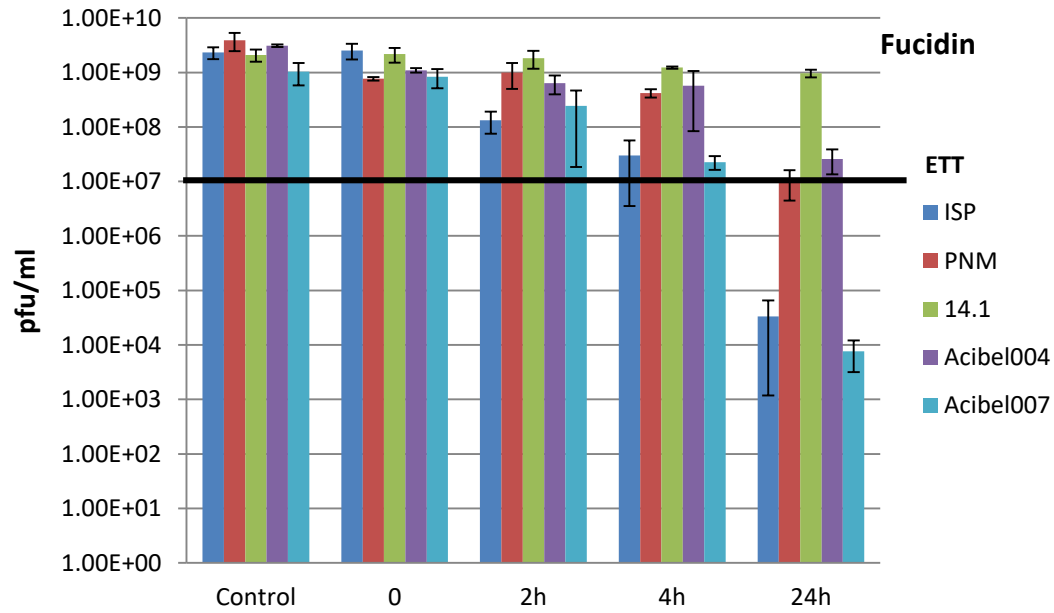

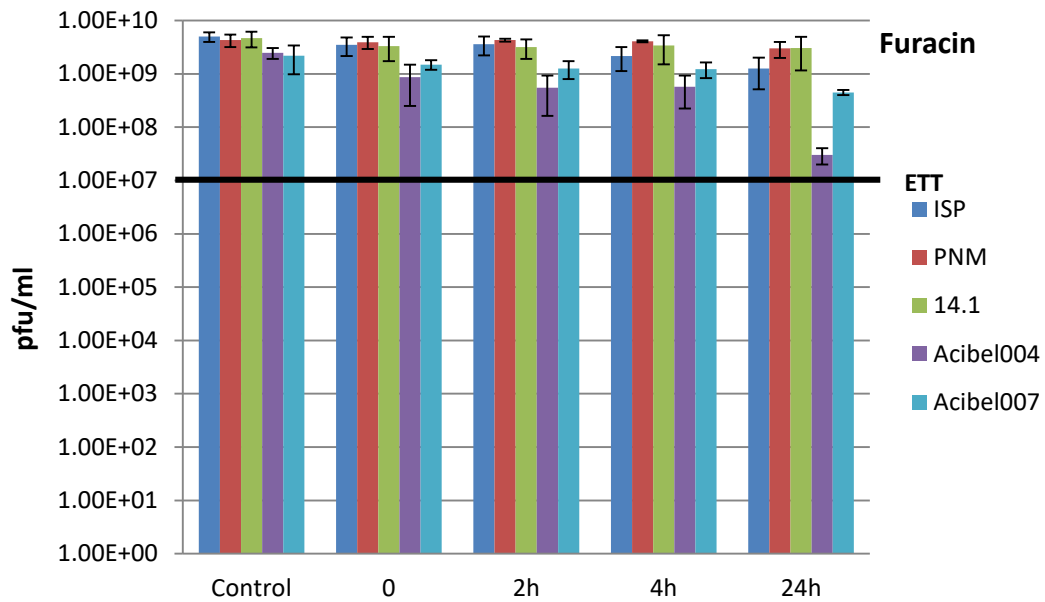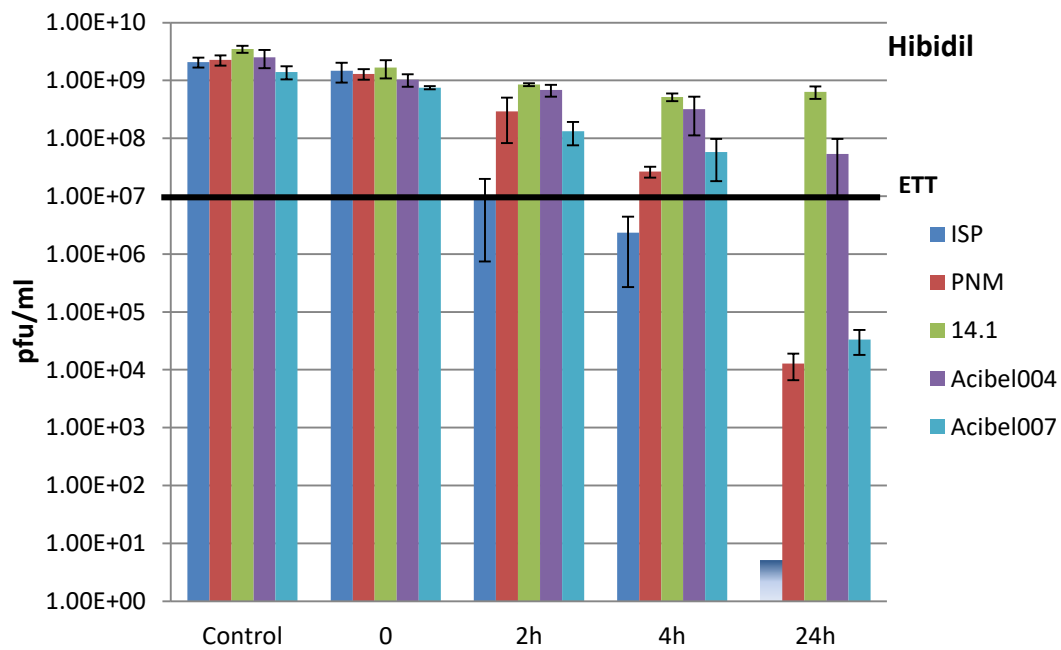

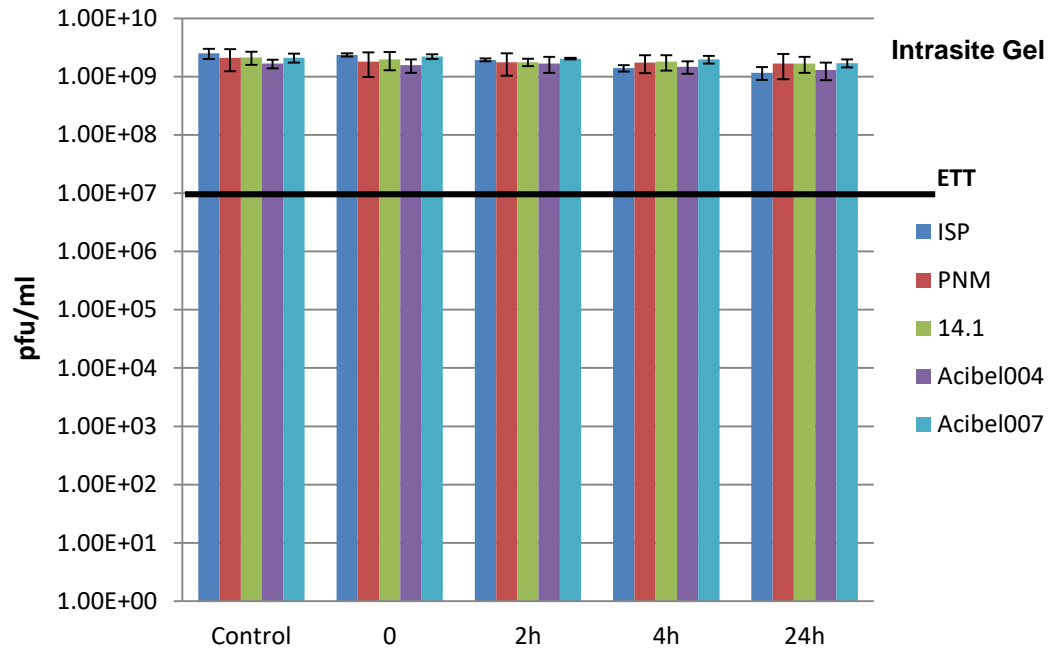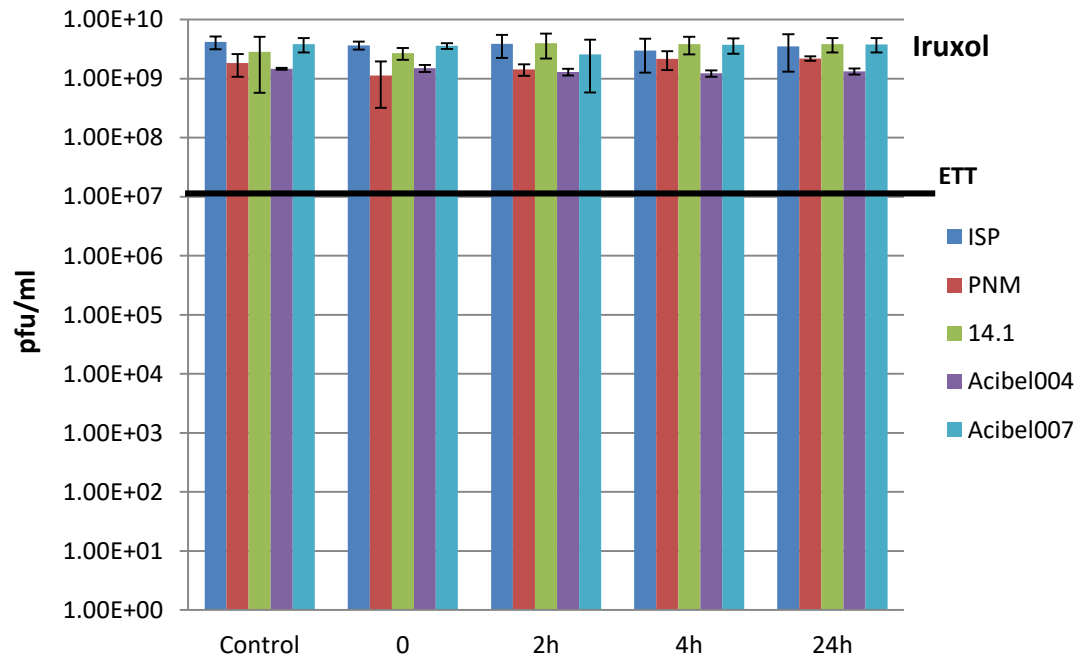

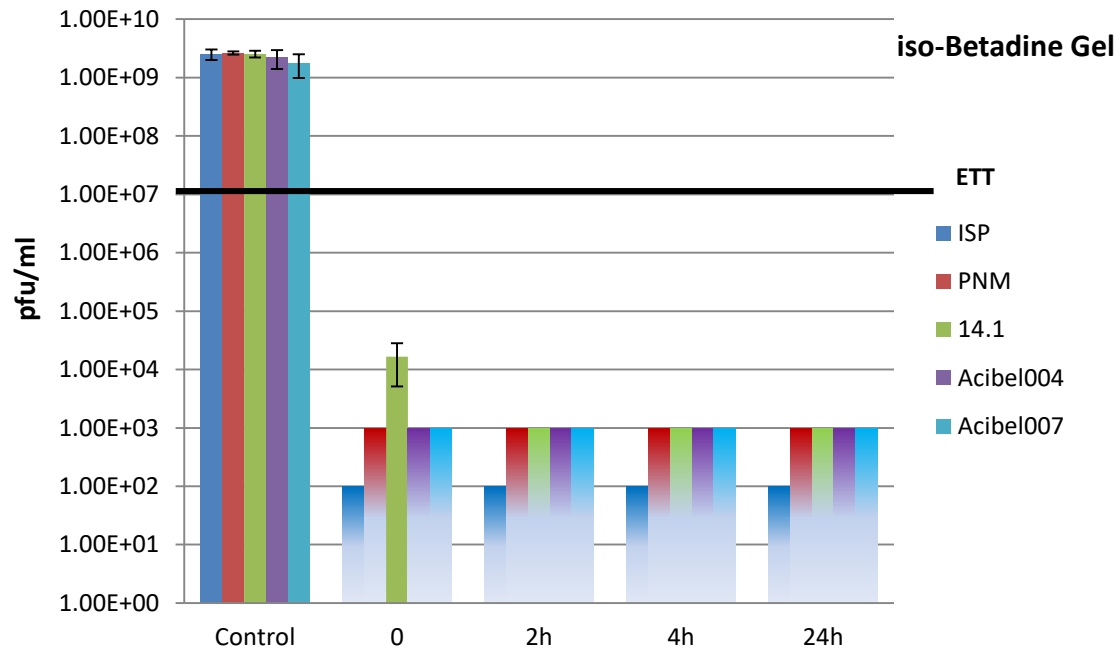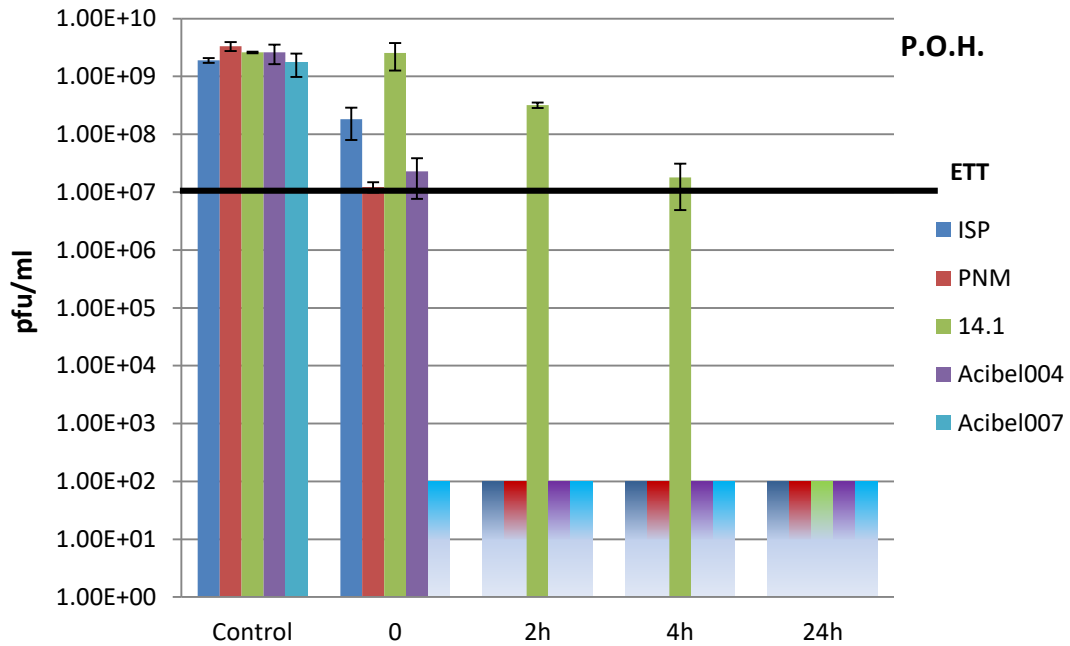

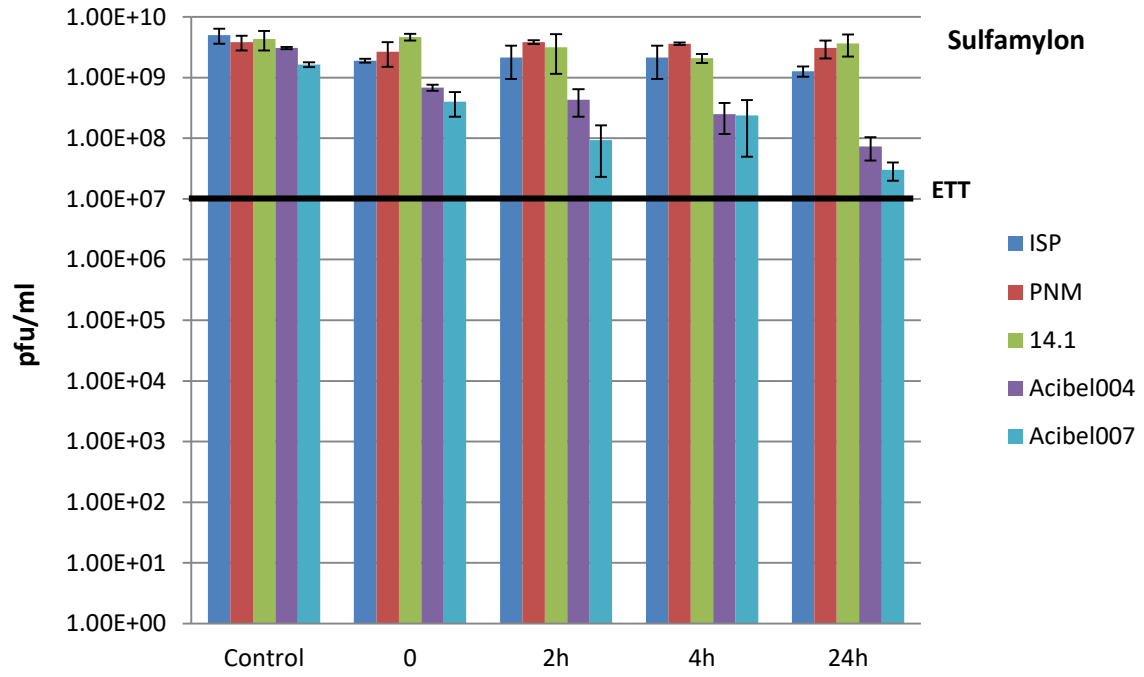

## B) Active ingredients

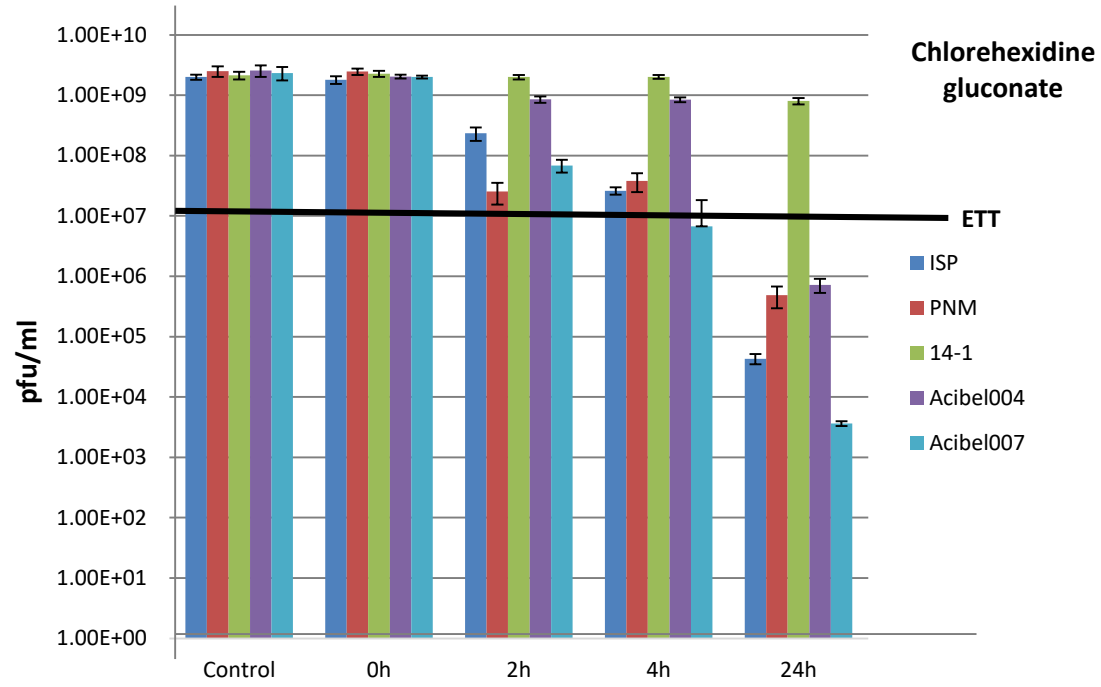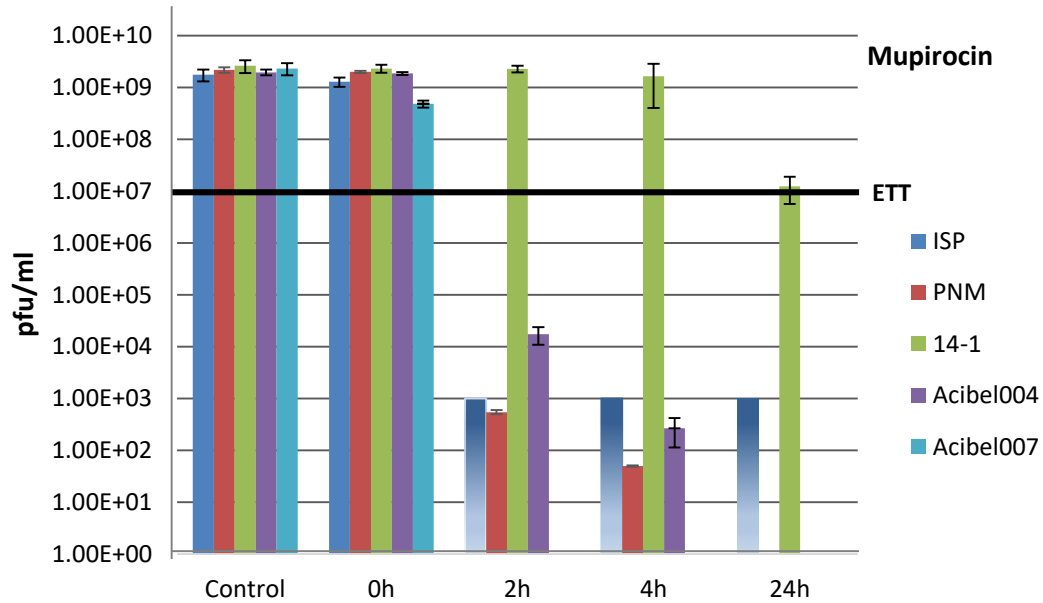



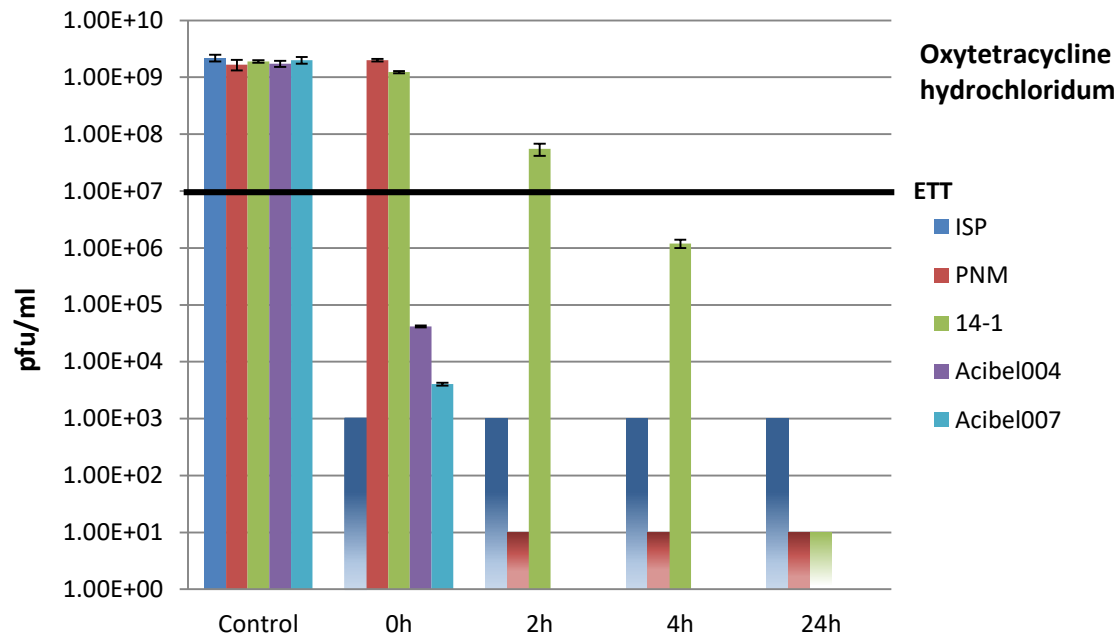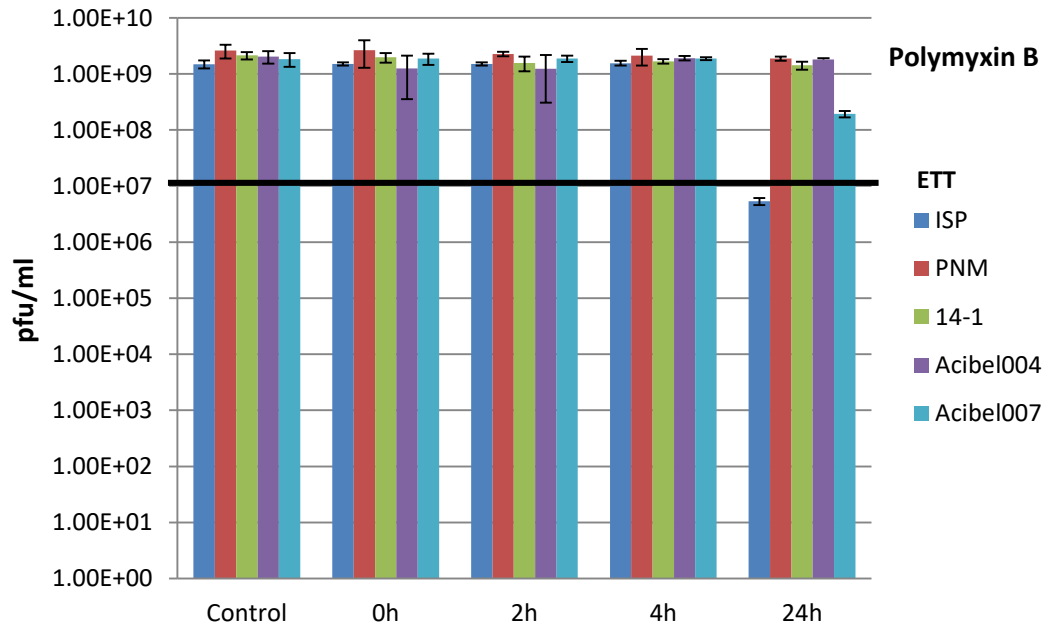

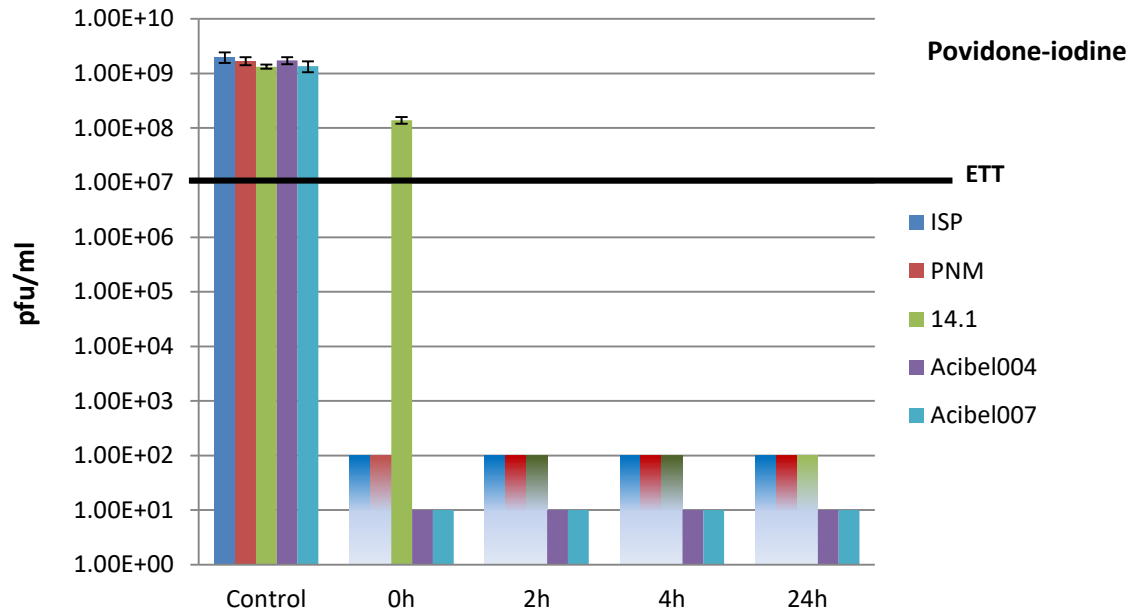

Supplement: pone.0182121.s001.pdf [file pone.0182121.s001.pdf]
